# Supplementary material for: Academia-Industry Linkages for Sustainable Innovation in Agriculture Higher Education in India
Source: MDPI journal article supplement (doi:10.3390/su152316450), 2023-11-30
Supplement: s1 [file s1]

Archive with 1 entries (1 files):
- sustainability-2597245-supplementary.pdf
