# Supplementary material for: Academia-Industry Linkages for Sustainable Innovation in Agriculture Higher Education in India
Source: MDPI journal article supplement (doi:10.3390/su152316450), 2023-11-30
Supplement: s1 [file s1 › sustainability-2597245-supplementary.pdf]

## Supplementary material

**Table S1.** Experts of the International Advisory Committee of NAHEP (Component 2).

| Name |                         | Designation and Affiliation                                                                                                                                                            |
|------|-------------------------|----------------------------------------------------------------------------------------------------------------------------------------------------------------------------------------|
| 1.   | Professor Brajesh Singh | Director of the Global Centre for Land-Based Innovation and Professor at the Hawkesbury Institute for the Environment<br>Western Sydney University, Australia                          |
| 2.   | Dr K.V. Raman           | International Professor of Plant Breeding and Associate Director (Special Projects)<br>International Programs at the College of Agriculture & Life Sciences<br>Cornell University, USA |
| 3.   | Dr Glen C. Shinn        | Professor Emeritus & Borlaug Senior Scientist in the Department of Agricultural Leadership, Education, and Communications<br>Texas A&M University, USA                                 |
| 4.   | Dr David Kraybill       | Professor Emeritus in the Department of Agricultural, Environmental and Development Economics<br>Ohio State University, Columbus, USA                                                  |

**Table S2.** Details of the consultative workshops conducted.

| Strata No. | Venue                                                                | Date                  | No. of participants |
|------------|----------------------------------------------------------------------|-----------------------|---------------------|
| 1.         | ICAR-National Academy of Agricultural Research Management, Hyderabad | 23-24, August 2019    | 21                  |
| 2.         | Mahatma Phule Krishi Vidyapeeth, Rahuri                              | 21-22, September 2019 | 33                  |
| 3.         | Orissa University of Agriculture and Technology, Bhubaneswar         | 23-24, September 2019 | 29                  |
| 4.         | University of Agricultural Sciences, Bangalore                       | 06-07, November 2019  | 24                  |
| 5.         | Sardar Vallabhbhai Patel University of Agriculture, Meerut           | 27-28, November 2019  | 21                  |
| 6.         | Assam Agriculture University, Guwahati                               | 27-28, January 2020   | 38                  |
| 7.         | Punjab Agricultural University, Ludhiana                             | 28-29, January 2020   | 33                  |

**Disclaimer/Publisher's Note:** The statements, opinions and data contained in all publications are solely those of the individual author(s) and contributor(s) and not of MDPI and/or the editor(s). MDPI and/or the editor(s) disclaim responsibility for any injury to people or property resulting from any ideas, methods, instructions or products referred to in the content.
